# Supplementary material for: Simultaneous ultraviolet and first near-infrared window absorption of luminescent carbon dots/PVA composite film
Source: PubMed Central journal article supplement (PMC9061165; doi:10.1039/c8ra09742a), 2019-03-06
Supplement: RA-009-C8RA09742A-s001.pdf [file RA-009-C8RA09742A-s001.pdf]

Electronic Supplementary Information

## Simultaneous ultraviolet and first near-infrared window absorption of luminescence carbon dots/PVA composite film

Melda Taspika,<sup>a</sup> Fitri Aulia Permatasari,<sup>a</sup> Bebeh Wahid Nuryadin,<sup>b</sup> Tirta Rona Mayangsari,<sup>c,d</sup>  
Akfiny Hasdi Aimon,<sup>a</sup> and Ferry Iskandar,<sup>a,c\*</sup>

- Department of Physics, Faculty of Mathematics and Natural Sciences, Institut Teknologi Bandung, Jalan Ganesha 10 Bandung 40132, Indonesia. E-mail: ferry@fi.itb.ac.id
- Department of Physics, Universitas Negeri Islam Sunan Gunung Djati, Jalan A. H. Nasution Cibiru Bandung 40614, Indonesia.
- Research Center for Nanosciences and Nanotechnology (RCNN), Institut Teknologi Bandung, Jalan Ganesha 10 Bandung 40132, Indonesia.
- Department of Chemistry, Universitas Pertamina, Jl. Teuku Nyak Arief, Simprug, Jakarta 12220, Indonesia.

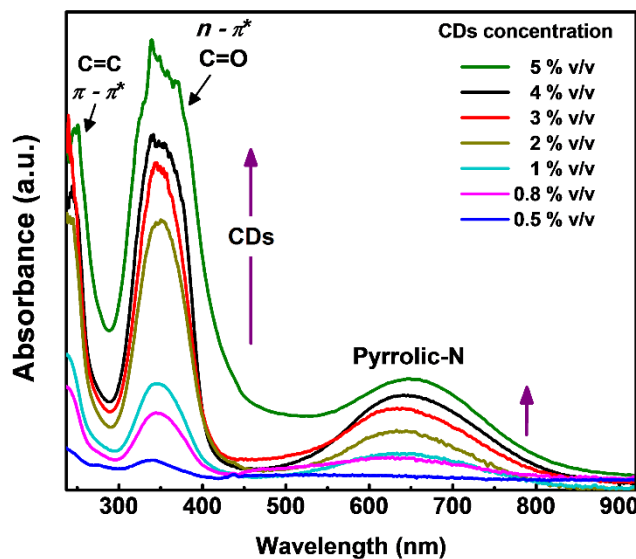

Fig. S1. UV-vis spectra of CDs/PVA composite films with different concentration of dispersed CDs in PVA.

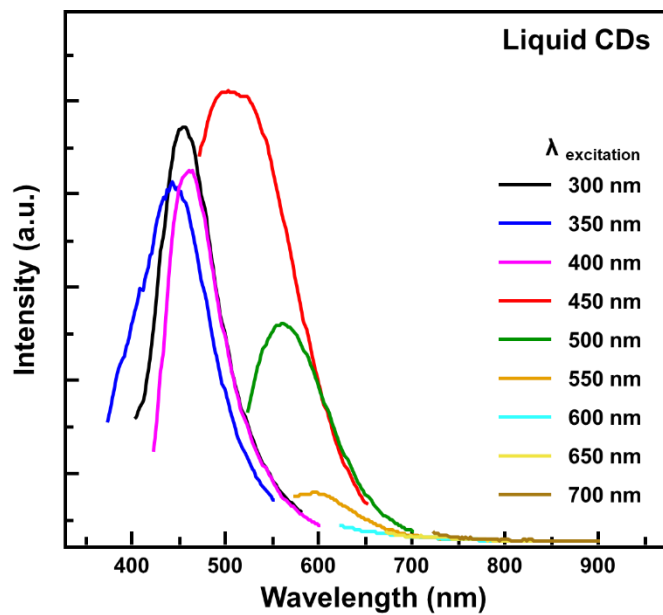

Fig. S2. Photoluminescence spectra of the liquid CDs under various excitation wavelength.

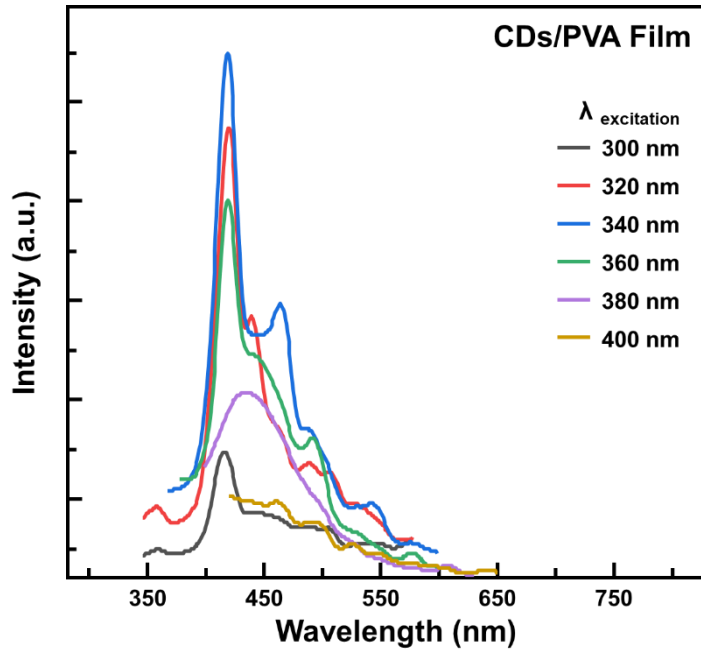

Fig. S3. Photoluminescence spectra of the CDs/PVA composite film with CDs concentration of 4% v/v under various excitation wavelength.
